# Supplementary material
Source: Springer Nature journal article supplement (https://www.springermedizin.de/resource/supplementary/13054_2003_2870_MOESM1_ESM.pdf/9719182)

(a) **mean arterial pressure**

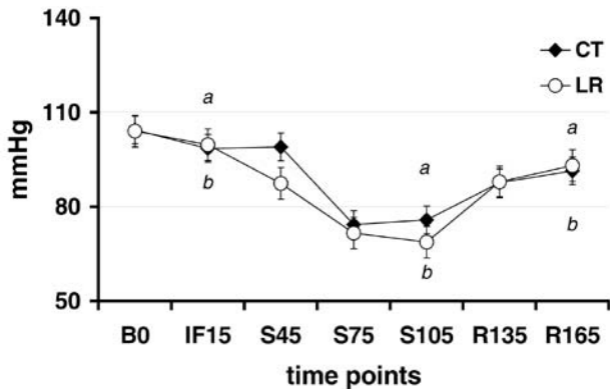

(b) **cardiac index**

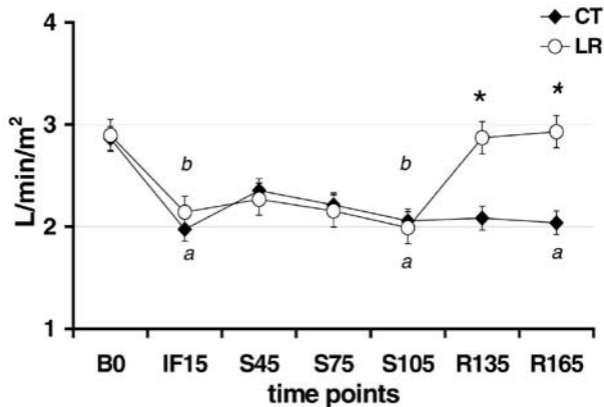

Supplement: MOESM1 [file 9719182]
